# Supplementary material
Source: publisher site journal article supplement (https://www.spandidos-publications.com/8054/downloadSupplementary)
Supplement: Supplementary file 1 [file downloadSupplementary]

## Sheet: Sheet1
Table SI. List of upregulated and downregulated genes.
	Upregulated genes			Downregulated genes
1	ACTB			CALML4
2	CDK1			CD34
3	EGFR			BCL2
4	AURKB			CXCL12
5	TOP2A			NRXN1
6	CCNA2			CYP3A4
7	CDC20			NTRK2
8	AURKA			SYP
9	BUB1B			FGF10
10	RAD51			FGF7
11	PLK1			ARRB1
12	CENPA			GNG7
13	KIF23			FGF9
14	ANLN			GRIN2A
15	BIRC5			ALDH2
16	EXO1			DCN
17	CDCA8			ANK3
18	KIF20A			SOX10
19	KIF2C			NTRK3
20	CHEK1			REN
21	MAD2L1			ANK2
22	BUB1			FGFR1
23	UBE2C			HGF
24	CCNB2			IL5
25	CDC6			ABCB1
26	CDC45			CYP2C19
27	FOXM1			TRPV1
28	NUF2			MYOD1
29	RACGAP1			F2
30	RRM2			SLC17A7
31	CENPF			CYP1B1
32	TPX2			ADGRL2
33	KIF4A			GPX3
34	TTK			HTR2A
35	TYMS			NGFR
36	DLGAP5			CLU
37	CDCA5			CLDN5
38	NEK2			ABCG2
39	ASPM			GPX2
40	CDC25C			TEK
41	MKI67			RBFOX3
42	MELK			KCNA1
43	TRIP13			SELP
44	KIF15			CX3CR1
45	SMC4			SELE
46	NCAPG			CYP2D6
47	NDC80			PGR
48	HJURP			KCNA2
49	KIF14			CACNB2
50	HMMR			CACNA1F
51	CEP55			CACNA1I
52	CENPE			NTF3
53	MCM10			HSDL2
54	SPAG5			OXTR
55	NUSAP1			KALRN
56	PRC1			SYN1
57	NCAPH			EPHX1
58	FEN1			MYH11
59	UHRF1			ACADM
60	KPNA2			CACNG8
61	H3C13			SPARCL1
62	MCM7			SLC6A4
63	CENPN			ACOX2
64	CDCA3			CXCR2
65	H3C12			CADM1
66	KIF18A			NOG
67	ZWINT			P2RY12
68	KIFC1			OCLN
69	MYBL2			LYVE1
70	SKA3			ALDH3A1
71	DEPDC1			ACOX3
72	CDKN3			ACADSB
73	RFC4			CYP17A1
74	DTL			ADCY4
75	RAD51AP1			NOS1
76	NEIL3			SOX5
77	DIAPH3			KLF4
78	MCM2			TTN
79	GTSE1			ALDH4A1
80	SHCBP1			ERVW-1
81	HIF1A			CYP4A11
82	PCLAF			CNTN2
83	CENPI			ENPP3
84	SKA1			MAOB
85	H4C6			CX3CL1
86	CENPW			NPPA
87	KNL1			CACNA2D4
88	CKS2			OTC
89	GINS1			MGP
90	WDHD1			ACKR1
91	CKAP2L			EPB41
92	CKS1B			TXN
93	H2AZ1			SCN11A
94	PIMREG			CACNB4
95	CCNF			FCGR2B
96	TGFB1			CYSLTR1
97	TACC3			EDN3
98	ITGB1			GPC3
99	CCNE1			GABRB2
100	E2F7			ALDH6A1
101	CLSPN			GFRA1
102	TROAP			ERVFRD-1
103	HSPA5			IL3RA
104	ARHGAP11A			OGN
105	PKMYT1			KCNMA1
106	SPC24			EFNB3
107	THBS1			GRIK5
108	SGO2			EMCN
109	ORC6			PAX7
110	SKP2			SLC10A1
111	H2AC18			BCKDHB
112	KNSTRN			ECHDC2
113	IQGAP3			ADHFE1
114	APP			PDE6B
115	ANXA2			CACNA2D2
116	FLNA			GRIK3
117	TFRC			GRIN2C
118	H2BC11			MAP2
119	ANXA5			PLCB4
120	H2BC17			COL14A1
121	H2BC5			SOX6
122	RUVBL1			MFAP4
123	H2AC8			UGT2B17
124	MET			GSTA1
125	H2BC13			GSTM3
126	H2BC14			SPTBN4
127	H2BC9			SHMT1
128	H2BC15			GSTM2
129	LMNB2			GPT2
130	SPP1			ITPR2
131	H2AC14			CXCR5
132	H2AC7			LPAR1
133	COL4A2			RGS5
134	PKM			KAT2B
135	RUNX1			LMO2
136	COL4A1			LAMA2
137	CCT5			CACNA2D3
138	ACTN1			GPD1L
139	CIT			KCNQ4
140	PGK1			PBX1
141	PLAU			GSN
142	DBF4			GNA14
143	POC1A			GPR17
144	MMP14			GLS2
145	PSMD14			NR1I3
146	ITGB4			CYP27A1
147	RHOC			PLCZ1
148	HSP90B1			DGAT2
149	MMP3			SYCP3
150	ITGA6			IL1RN
151	SHC1			PDE5A
152	VASP			NR3C2
153	COL10A1			GLUD2
154	SDC1			GSTM4
155	FURIN			SCN7A
156	PSMD2			SYNE1
157	CBX2			KCNJ9
158	COL7A1			PTCH1
159	CBX3			FBLN5
160	SOX9			PAX1
161	BSG			NEGR1
162	CCT4			GAB1
163	POLR2H			VEGFD
164	UBE2S			TFPI
165	CCND2			THBS4
166	EPCAM			KL
167	ITGA3			FSCN2
168	DNMT3B			USH2A
169	CTSB			HTD2
170	FLNB			ACSL6
171	SEM1			ENTPD8
172	PSRC1			SLIT3
173	CBX8			PRELP
174	ITGA2			NFIB
175	HPRT1			FHIT
176	TUBA1B			CYP4F3
177	AJUBA			GSTM5
178	PRIM2			LRRK2
179	GART			KCNE1
180	ITGA1			DGKG
181	PPIA			DNAH1
182	TUBA1C			EPB41L3
183	COL12A1			PPP1R1B
184	PIF1			CCL17
185	VANGL1			CCT6B
186	BMP1			THPO
187	KIF4B			PLP1
188	LAMC2			LNX1
189	ACLY			FOXP2
190	RAB7A			ITGA8
191	MSN			AMT
192	LDHA			ABCB4
193	SNAI2			CRY2
194	RAC2			ECH1
195	YWHAQ			ACSM3
196	CD151			ETFDH
197	CTPS1			LTBP3
198	SERPINH1			AVPR2
199	P4HA2			PNMA8B
200	HOXA2			RSPH4A
201	SLC2A1			SLIT2
202	ADAM10			PLA2G3
203	TUBB3			DGKE
204	ACTL6A			SLC4A4
205	AP2M1			MMEL1
206	PSMD9			NRG2
207	LAMB3			TACR1
208	CENPL			BST1
209	H2AC13			CNTFR
210	TGFA			CNTN4
211	SDC4			CATSPER3
212	PLOD1			RASGRP2
213	LAMA3			CLEC14A
214	DNAJB11			MBOAT1
215	NUP155			CILP
216	YWHAH			KLKB1
217	SERPINA1			PTGER3
218	CD3EAP			CYP11A1
219	AGRN			PRDM16
220	NDE1			DNALI1
221	PLOD2			F7
222	VEGFC
223	GNB5
224	COL16A1
225	MRPL13
226	NME1
227	SLC1A5
228	RELB
229	CEBPB
230	H2AC12
231	PRNP
232	MAD2L2
233	KIFC3
234	PDIA6
235	KLC3
236	RPS29
237	TRAIP
238	MRPL3
239	HOXA1
240	TUBB6
241	FSCN1
242	ADAM12
243	AREG
244	ADAMTS2
245	EGLN3
246	PDGFA
247	CDK18
248	ANGPT2
249	CASP7
250	P3H1
251	RPN1
252	SLC16A3
253	COL27A1
254	PDIA4
255	PLOD3
256	RANBP1
257	COL13A1
258	PPIF
259	SPHK1
260	LIMK1
261	CTSL
262	ITPR3
263	ANGPTL4
264	ZYX
265	PFDN2
266	ARPC1B
267	PLXNA1
268	LOXL2
269	COLGALT1
270	MRPL36
271	SLC7A5
272	RAP1B
273	CALD1
274	BAIAP2L2
275	CNN2
276	PGF
277	AUNIP
278	CALU
279	INHBA
280	GNAI1
281	F11R
282	PLEK2
283	LTBR
284	IMPDH1
285	EIF4G1
286	PNP
287	THBD
288	MYO9B
289	BCAP31
290	KCNJ6
291	HOXA9
292	TM4SF19
293	NOX4
294	CCL20
295	TH
296	ADORA2B
297	GNA12
298	F2R
299	PCDH7
300	MAPK6
301	GLI3
302	CDH3
303	SEC61G
304	TNC
305	SLC16A1
306	TCF3
307	PDPN
308	ADA
309	PRDX4
310	CPNE8
311	PDLIM7
312	ADAM9
313	KRT17
314	EXT1
315	RTKN
316	RRBP1
317	RIPK2
318	MRPL47
